# Supplementary material for: Building an Adverse Outcome Pathway network for COVID-19
Source: Front Syst Biol. 2024 Jun 7;4:1384481. doi: 10.3389/fsysb.2024.1384481 (PMC11977783; doi:10.3389/fsysb.2024.1384481)
Supplement: Supplementary file 1 [file Table1.XLSX]

## Sheet: AOPs and KEs used for network
AOP	KEin	KEout	KEin attribute	KEout attribute	Adjacency (Y/N)
Lung - Pulmonary fibrosis (173)	1495 Interaction with the lung resident cell membrane components	Increased, secretion of proinflammatory mediators (KEs 1496, 87)	MIE	KE	Y
Lung - Pulmonary fibrosis (173)	Increased, secretion of proinflammatory mediators (KEs 1496, 87)	Increased, recruitement of leukocytes (KEs 1497, 1750)	KE	KE	Y
Lung - Pulmonary fibrosis (173)	Increased, recruitement of leukocytes (KEs 1497, 1750)	1498 Loss of alveolar capillary membrane integrity	KE	KE	Y
Lung - Pulmonary fibrosis (173)	1498 Loss of alveolar capillary membrane integrity	1499 Increased, activation of T (T) helper (h) type 2 cells	KE	KE	Y
Lung - Pulmonary fibrosis (173)	1499 Increased, activation of T (T) helper (h) type 2 cells	1500 Increased, fibroblast proliferation and myofibroblast differentiation	KE	KE	Y
Lung - Pulmonary fibrosis (173)	1500 Increased, fibroblast proliferation and myofibroblast differentiation	Increased, extracellular matrix deposition (KEs 1501, 68)	KE	KE	Y
Lung - Pulmonary fibrosis (173)	Increased, extracellular matrix deposition (KEs 1501, 68)	Pulmonary fibrosis (KEs 1458, 1276)	KE	AO	Y
Lung - Decreased lung function (302)	1672 Inhibition of lung surfactant function	1673 Alveolar collapse	MIE	KE	Y
Lung - Decreased lung function (302)	1673 Alveolar collapse	1498 Loss of alveolar capillary membrane integrity	KE	KE	Y
Lung - Decreased lung function (302)	1673 Alveolar collapse	1677 Reduced tidal volume	KE	KE	Y
Lung - Decreased lung function (302)	1498 Loss of alveolar capillary membrane integrity	1677 Reduced tidal volume	KE	KE	Y
Lung - Decreased lung function (302)	1498 Loss of alveolar capillary membrane integrity	1672 Inhibition of lung surfactant function	KE	MIE	Y
Lung - Decreased lung function (302)	1677 Reduced tidal volume	1250 Decrease, Lung function	KE	AO	Y
Lung - Decreased lung function (302)	1672 Inhibition of lung surfactant function	1250 Decrease, Lung function	MIE	AO	N
Lung - Decreased lung function (302)	1673 Alveolar collapse	1250 Decrease, Lung function	KE	AO	N
Lung - Decreased lung function (302)	1498 Loss of alveolar capillary membrane integrity	1250 Decrease, Lung function	KE	AO	N
Lung - Pulmonary fibrosis (319)	ACE2 inhibition (KEs 1740, 1787)	Increased Angiotensin II (KEs 1752, 1743, 1741)	MIE	KE	Y
Lung - Pulmonary fibrosis (319)	Increased Angiotensin II (KEs 1752, 1743, 1741)	Increased Ang II type 1 receptor (AT1R) (KEs 1852, 1851)	KE	KE	Y
Lung - Pulmonary fibrosis (319)	Increased Ang II type 1 receptor (AT1R) (KEs 1852, 1851)	Oxidative stress response (KEs 1869, 1115)	KE	KE	Y
Lung - Pulmonary fibrosis (319)	Oxidative stress response (KEs 1869, 1115)	1172 Increase activation, Nuclear factor kappa B (NF-kB)	KE	KE	Y
Lung - Pulmonary fibrosis (319)	1172 Increase activation, Nuclear factor kappa B (NF-kB)	Increased, secretion of proinflammatory mediators (KEs 1496, 87)	KE	KE	Y
Lung - Pulmonary fibrosis (319)	Increased, secretion of proinflammatory mediators (KEs 1496, 87)	Increased, extracellular matrix deposition (KEs 1501, 68)	KE	KE	Y
Lung - Pulmonary fibrosis (319)	Increased, extracellular matrix deposition (KEs 1501, 68)	Pulmonary fibrosis (KEs 1458, 1276)	KE	AO	Y
Lung - Acute respiratory distress (ARDS) associated mortality (320)	1739 ACE2 bidning to viral S-protein	1738 Increased susceptibility to viral entry	MIE	KE	Y
Lung - Acute respiratory distress (ARDS) associated mortality (320)	1738 Increased susceptibility to viral entry	1901 IFN-I antiviral response, antagonized	KE	KE	Y
Lung - Acute respiratory distress (ARDS) associated mortality (320)	1901 IFN-I antiviral response, antagonized	1847 Increased coronavirus production	KE	KE	Y
Lung - Acute respiratory distress (ARDS) associated mortality (320)	1847 Increased coronavirus production	1848 Induced Toll Like Receptor (TLR) Dysregulation	KE	KE	Y
Lung - Acute respiratory distress (ARDS) associated mortality (320)	1848 Induced Toll Like Receptor (TLR) Dysregulation	Increased, secretion of proinflammatory mediators (KEs 1496, 87)	KE	KE	Y
Lung - Acute respiratory distress (ARDS) associated mortality (320)	Increased, secretion of proinflammatory mediators (KEs 1496, 87)	Increased, recruitement of leukocytes (KEs 1497, 1750)	KE	KE	Y
Lung - Acute respiratory distress (ARDS) associated mortality (320)	Increased, recruitement of leukocytes (KEs 1497, 1750)	1748 Increase, the risk of acute respiratory failure	KE	KE	Y
Lung - Acute respiratory distress (ARDS) associated mortality (320)	1748 Increase, the risk of acute respiratory failure	351 Increased mortality	KE	AO	Y
Neuro - Encephalitis (374)	1739 ACE2 bidning to viral S-protein	188 Neuroinflammation	MIE	KE	Y
Neuro - Encephalitis (374)	188 Neuroinflammation	352 Neurodegeneration	KE	KE	Y
Neuro - Encephalitis (374)	188 Neuroinflammation	1841 Encephalitis	KE	AO	Y
Neuro - Encephalitis (374)	352 Neurodegeneration	1841 Encephalitis	KE	AO	Y
Vascular - Thrombosis and Disseminated intravascular coagulation (379)	1739 ACE2 bidning to viral S-protein	1738 Increased susceptibility to viral entry	MIE	KE	Y
Vascular - Thrombosis and Disseminated intravascular coagulation (379)	1738 Increased susceptibility to viral entry	1901 IFN-I antiviral response, antagonized	KE	KE	Y
Vascular - Thrombosis and Disseminated intravascular coagulation (379)	1901 IFN-I antiviral response, antagonized	1847 Increased coronavirus production	KE	KE	Y
Vascular - Thrombosis and Disseminated intravascular coagulation (379)	1847 Increased coronavirus production	Oxidative stress response (KEs 1869, 1115)	KE	KE	Y
Vascular - Thrombosis and Disseminated intravascular coagulation (379)	Oxidative stress response (KEs 1869, 1115)	1845 Coagulation	KE	KE	Y
Vascular - Thrombosis and Disseminated intravascular coagulation (379)	1845 Coagulation	1846 Thrombosis and Disseminated intravascular coagulation	KE	AO	Y
Hyperinflammation (392)	1866 Fibrinolysis, decreased	1867 Bradykinin system, hyperactivated	MIE	MIE	Y
Hyperinflammation (392)	1867 Bradykinin system, hyperactivated	1866 Fibrinolysis, decreased	MIE	MIE	Y
Hyperinflammation (392)	1867 Bradykinin system, hyperactivated	Increased, secretion of proinflammatory mediators (KEs 1496, 87)	MIE	KE	Y
Hyperinflammation (392)	Increased, secretion of proinflammatory mediators (KEs 1496, 87)	Increased, recruitement of leukocytes (KEs 1497, 1750)	KE	KE	Y
Hyperinflammation (392)	1866 Fibrinolysis, decreased	Increased, secretion of proinflammatory mediators (KEs 1496, 87)	MIE	KE	N
Hyperinflammation (392)	1867 Bradykinin system, hyperactivated	1868 Hyperinflammation	MIE	AO	N
Hyperinflammation (392)	Increased, recruitement of leukocytes (KEs 1497, 1750)	1868 Hyperinflammation	KE	AO	Y
Sensory - Anosmia (394)	1739 ACE2 bidning to viral S-protein	1738 Increased susceptibility to viral entry	MIE	KE	Y
Sensory - Anosmia (394)	1738 Increased susceptibility to viral entry	1847 Increased coronavirus production	KE	KE	Y
Sensory - Anosmia (394)	1847 Increased coronavirus production	1870 Sustentacular cells, decrease	KE	KE	Y
Sensory - Anosmia (394)	1870 Sustentacular cells, decrease	1871 Olfactory sensory neurons, decrease	KE	KE	Y
Sensory - Anosmia (394)	1871 Olfactory sensory neurons, decrease	1872 Olfactory epithelium degeneration	KE	KE	Y
Sensory - Anosmia (394)	1872 Olfactory epithelium degeneration	1873 Impaired olfactory function (anosmia)	KE	AO	Y
Sensory - Anosmia (394)	1871 Olfactory sensory neurons, decrease	1873 Impaired olfactory function (anosmia)	KE	AO	N
Neuro - Stroke (395)	1739 ACE2 bidning to viral S-protein	1738 Increased susceptibility to viral entry	MIE	KE	Y
Neuro - Stroke (395)	1738 Increased susceptibility to viral entry	1874 Blood brain barrier disruption	KE	KE	Y
Neuro - Stroke (395)	1874 Blood brain barrier disruption	1846 Thrombosis and Disseminated intravascular coagulation	KE	AO	Y
Neuro - Stroke (395)	1846 Thrombosis and Disseminated intravascular coagulation	1875 Cerebrovascular disease (stroke)	AO	AO	Y
Vascular - Thromboinflammation (412)	1913 Endothelial dysfunction	Increased, secretion of proinflammatory mediators (KEs 1496, 87)	MIE	KE	Y
Vascular - Thromboinflammation (412)	Increased, secretion of proinflammatory mediators (KEs 1496, 87)	1914 Platelet activation, Increased	KE	KE	Y
Vascular - Thromboinflammation (412)	Increased, secretion of proinflammatory mediators (KEs 1496, 87)	1915 Neutrophil activation, Increased	KE	KE	Y
Vascular - Thromboinflammation (412)	1914 Platelet activation, Increased	1857 Platelet-neutrophil interactions, Increased	KE	KE	Y
Vascular - Thromboinflammation (412)	1915 Neutrophil activation, Increased	1857 Platelet-neutrophil interactions, Increased	KE	KE	Y
Vascular - Thromboinflammation (412)	1857 Platelet-neutrophil interactions, Increased	1916 Thromboinflammation, Increased	KE	AO	Y
Gastrointestinal disorders (422)	1739 ACE2 bidning to viral S-protein	1738 Increased susceptibility to viral entry	MIE	KE	Y
Gastrointestinal disorders (422)	1738 Increased susceptibility to viral entry	1901 IFN-I antiviral response, antagonized	KE	KE	Y
Gastrointestinal disorders (422)	1901 IFN-I antiviral response, antagonized	1847 Increased coronavirus production	KE	KE	Y
Gastrointestinal disorders (422)	1847 Increased coronavirus production	1931 Intestinal barrier, disruption	KE	AO	Y
Gastrointestinal disorders (428)	1739 ACE2 bidning to viral S-protein	1854 Dysregulation, ACE2 expression and activity	MIE	KE	Y
Gastrointestinal disorders (428)	1854 Dysregulation, ACE2 expression and activity	1954 Gut microbiota, alteration	KE	KE	Y
Sars-CoV-2 infection proliferation (430)	1739 ACE2 bidning to viral S-protein	1738 Increased susceptibility to viral entry	MIE	KE	Y
Sars-CoV-2 infection proliferation (430)	1738 Increased susceptibility to viral entry	1901 IFN-I antiviral response, antagonized	KE	KE	Y
Sars-CoV-2 infection proliferation (430)	1901 IFN-I antiviral response, antagonized	1847 Increased coronavirus production	KE	KE	Y
Sars-CoV-2 infection proliferation (430)	1847 Increased coronavirus production	1939 Viral infection, proliferated	KE	AO	Y

## Sheet: harmonization of KEs
Corresponding KE 1	Corresponding KE 2	Corresponding KE 3	Harmonized KE title
1458 Pulmonary fibrosis	1276 Lung fibrosis		Pulmonary fibrosis (KEs 1458, 1276)
1501 Increased, extracellular matrix deposition	68 Accumulation, Collagen		Increased, extracellular matrix deposition (KEs 1501, 68)
1752 Increased Angiotensin II	1743 Increase plasma Ang II	1741 Induced, Angiotensin (Ang) II accumulation	Increased Angiotensin II (KEs 1752, 1743, 1741)
1869 Oxidative stress response	1115 Increased, Reactive oxygen species		Oxidative stress response (KEs 1869, 1115)
1496 Increased, secretion of proinflammatory and profibrotic mediators	87 Release, Cytokine		Increased, secretion of proinflammatory mediators (KEs 1496, 87)
1497 Increased, recruitment of inflammatory cells	1750 Increased inflammatory immune responses		Increased, recruitement of leukocytes (KEs 1497, 1750)
1740 ACE2 inhibition	1787 Downregulation, ACE2		ACE2 inhibition (KEs 1740, 1787)
1852 Increased Ang II type 1 receptor (AT1R)	1851 Binding of agonist, Angiotensin II receptor type 1 receptor (AT1R)		Increased Ang II type 1 receptor (AT1R) (KEs 1852, 1851)

## Sheet: Ontology mapping
AOPwiki ID	AOPwiki term	COVID-19 ontology ID	COVID-19 ontology term	COVID-19 ontology url
173	Lung fibrosis	DOID:3770	pulmonary fibrosis	http://purl.obolibrary.org/obo/DOID_3770
319	Lung fibrosis	DOID:3770	pulmonary fibrosis	http://purl.obolibrary.org/obo/DOID_3770
320	Acute respiratory distress associated mortality	HP:0002880	Respiratory distress	http://purl.obolibrary.org/obo/HP_0002098
379	Thrombosis and Disseminated intravascular coagulation	DOID:11247	disseminated intravascular coagulation	http://purl.obolibrary.org/obo/DOID_11247
392	Hyperinflammation	HP:0012647	Abnormal inflammatory response	http://purl.obolibrary.org/obo/HP_0012647
374	Encephalitis	MP:0001847	brain inflammation	http://purl.obolibrary.org/obo/MP_0001847
302	Decreased lung function	HP:0005952	Decreased pulmonary function	http://purl.obolibrary.org/obo/HP_0005952
394	Anosmia	HP:0000458	Anosmia	http://purl.obolibrary.org/obo/HP_0000458
1495	Interaction with the lung resident cell membrane components	-
1496	Increased, secretion of proinflammatory and profibrotic mediators	GO:0002532	production of molecular mediator involved in inflammatory response	http://purl.obolibrary.org/obo/GO_0002532
1497	Increased, recruitment of inflammatory cells	TXPO:0000540	inflammatory cell infiltration	http://purl.obolibrary.org/obo/TXPO_0000540
1498	Loss of alveolar capillary membrane integrity
1499	Increased, activation of T (T) helper (h) type 2 cells	GO:0042093	T-helper cell differentiation	http://purl.obolibrary.org/obo/GO_0042093
1500	Increased, fibroblast proliferation and myofibroblast differentiation	GO:0048146	positive regulation of fibroblast proliferation	http://purl.obolibrary.org/obo/GO_0048146
1501	Increased, extracellular matrix deposition	GO:0062023	collagen-containing extracellular matrix	http://purl.obolibrary.org/obo/GO_0062023
1740	ACE2 inhibition	OGG:3000059272	ACE2	http://purl.obolibrary.org/obo/OGG_3000059272
1752	Increased Angiotensin II	CHEBI:48432	angiotensin II	http://purl.obolibrary.org/obo/CHEBI_48432
1743	Increase plasma Ang II	CHEBI:48432	angiotensin II	http://purl.obolibrary.org/obo/CHEBI_48432
68	Accumulation, Collagen	GO:0062023	collagen-containing extracellular matrix	http://purl.obolibrary.org/obo/GO_0062023
1739	ACE2 bidning to viral S-protein	OGG:3000059272	ACE2	http://purl.obolibrary.org/obo/OGG_3000059272
1738	Increased susceptibility to viral entry	GO:0019063	viral entry into host cell	http://purl.obolibrary.org/obo/GO_0046718
1847	Increased coronavirus production	GO:0022415	viral process	http://purl.obolibrary.org/obo/GO_0016032
1848	Induced Toll Like Receptor (TLR) Dysregulation
1750	Increased inflammatory immune responses	TXPO:0000540	inflammatory cell infiltration	http://purl.obolibrary.org/obo/TXPO_0000540
1748	Increase, the risk of acute respiratory failure	HP:0002880	Respiratory distress	http://purl.obolibrary.org/obo/HP_0002098
1851	Binding of agonist, Angiotensin II receptor type 1 receptor (AT1R)
1115	Increased, Reactive oxygen species	NCIT:C17741	Oxidative Stress	http://purl.obolibrary.org/obo/NCIT_C17741
1172	Increase activation, Nuclear factor kappa B (NF-κB)	GO:0038061	NIK/NF-kappaB signaling	http://purl.obolibrary.org/obo/GO_0038061
1854	Dysregulation, ACE2 expression and activity	OGG:3000059272	ACE2	http://purl.obolibrary.org/obo/OGG_3000059272
1787	Downregulation, ACE2	OGG:3000059272	ACE2	http://purl.obolibrary.org/obo/OGG_3000059272
1869	Oxidative stress response	NCIT:C17741	Oxidative Stress	http://purl.obolibrary.org/obo/NCIT_C17741
1845	Coagulation	GO:0007596	blood coagulation	http://purl.obolibrary.org/obo/GO_0007596
1866	Fibrinolysis, decreased	HP:0040224	Abnormality of fibrinolysis	http://purl.obolibrary.org/obo/HP_0040224
1867	Bradykinin system, hyperactivated
188	Neuroinflammation
352	N/A, Neurodegeneration
1741	Induced, Angiotensin (Ang) II accumulation	CHEBI:48432	angiotensin II	http://purl.obolibrary.org/obo/CHEBI_48432
1852	Increased Ang II type 1 receptor (AT1R)
1672	Inhibition of lung surfactant function
1673	Alveolar collapse
1677	Reduced tidal volume
1870	Sustentacular cells, decrease
1871	Olfactory sensory neurons, decrease
1872	Olfactory epithelium degeneration
1458	Pulmonary fibrosis	DOID:3770	pulmonary fibrosis	http://purl.obolibrary.org/obo/DOID_3770
1276	Lung fibrosis	DOID:3770	pulmonary fibrosis	http://purl.obolibrary.org/obo/DOID_3770
351	Increased mortality	OMIT:0010070	Mortality	http://purl.obolibrary.org/obo/OMIT_0010070
1846	Thrombosis and Disseminated intravascular coagulation	DOID:11247	disseminated intravascular coagulation	http://purl.obolibrary.org/obo/DOID_11247
1868	Hyperinflammation	HP:0012647	Abnormal inflammatory response	http://purl.obolibrary.org/obo/HP_0012647
1841	Encephalitis	MP:0001847	brain inflammation	http://purl.obolibrary.org/obo/MP_0001847
1850	Dysgeusia	SYMP:0000551	disturbances of sensation of smell and taste	http://purl.obolibrary.org/obo/SYMP_0000551
344	N/A, Liver fibrosis	DOID:409	liver disease	http://purl.obolibrary.org/obo/DOID_409
1250	Decrease, Lung function	HP:0005952	Decreased pulmonary function	http://purl.obolibrary.org/obo/HP_0005952
1873	Impaired olfactory function (anosmia)	HP:0000458	Anosmia	http://purl.obolibrary.org/obo/HP_0000458
377	ARDS and Multiple organ dysfunction (MOD)	SYMP:0000724	multiple organ failure	http://purl.obolibrary.org/obo/SYMP_0000724
378	High pathogen load
395	Stroke	SYMP:0000734	stroke	http://purl.obolibrary.org/obo/SYMP_0000734
1848	Induced Toll Like Receptor (TLR) Dysregulation
1844	Systemic inflammatory response syndrome	HP:0012647	Abnormal inflammatory response	http://purl.obolibrary.org/obo/HP_0012647
1843	ARDS and Multiple organ dysfunction (MOD)	SYMP:0000724	multiple organ failure	http://purl.obolibrary.org/obo/SYMP_0000724
1857	Platelet-neutrophil interactions, Increased	GO:0002283	neutrophil activation involved in immune response	http://purl.obolibrary.org/obo/GO_0002283
1739	ACE2 bidning to viral S-protein	OGG:3000059272	ACE2	http://purl.obolibrary.org/obo/OGG_3000059272
1738	Increased susceptibility to viral entry	GO:0019063	viral entry into host cell	http://purl.obolibrary.org/obo/GO_0046718
1874	Blood brain barrier disruption
1875	Cerebrovascular disease (stroke)	SYMP:0000734	stroke	http://purl.obolibrary.org/obo/SYMP_0000734
